# Supplementary material
Source: publisher figshare collection journal article supplement (https://wiley.figshare.com/articles/dataset/_/3518792)
Supplement: Supplementary file 1 [file 1 › appendix-B.htm]

Ecological Archives A023-077-A2


*Ecological Archives* A023-077-A2

Tarik C. Gouhier, Frédéric Guichard, Bruce A. Menge. 2013. Designing effective reserve networks for nonequilibrium metacommunities. *Ecological Applications* 23:1488–1503. http://dx.doi.org/10.1890/12-1801.1

Appendix B. The effects of harvesting on closed predator-prey communities with a type II functional response.

> View /download PDF.


---

[Back to A023-077]
